# Supplementary material for: Expression levels of long non-coding RNAs are prognostic for AML outcome
Source: Springer Nature journal article supplement (doi:10.1186/s13045-018-0596-2), 2018-04-07
Supplement: MOESM1 [file 15599138]

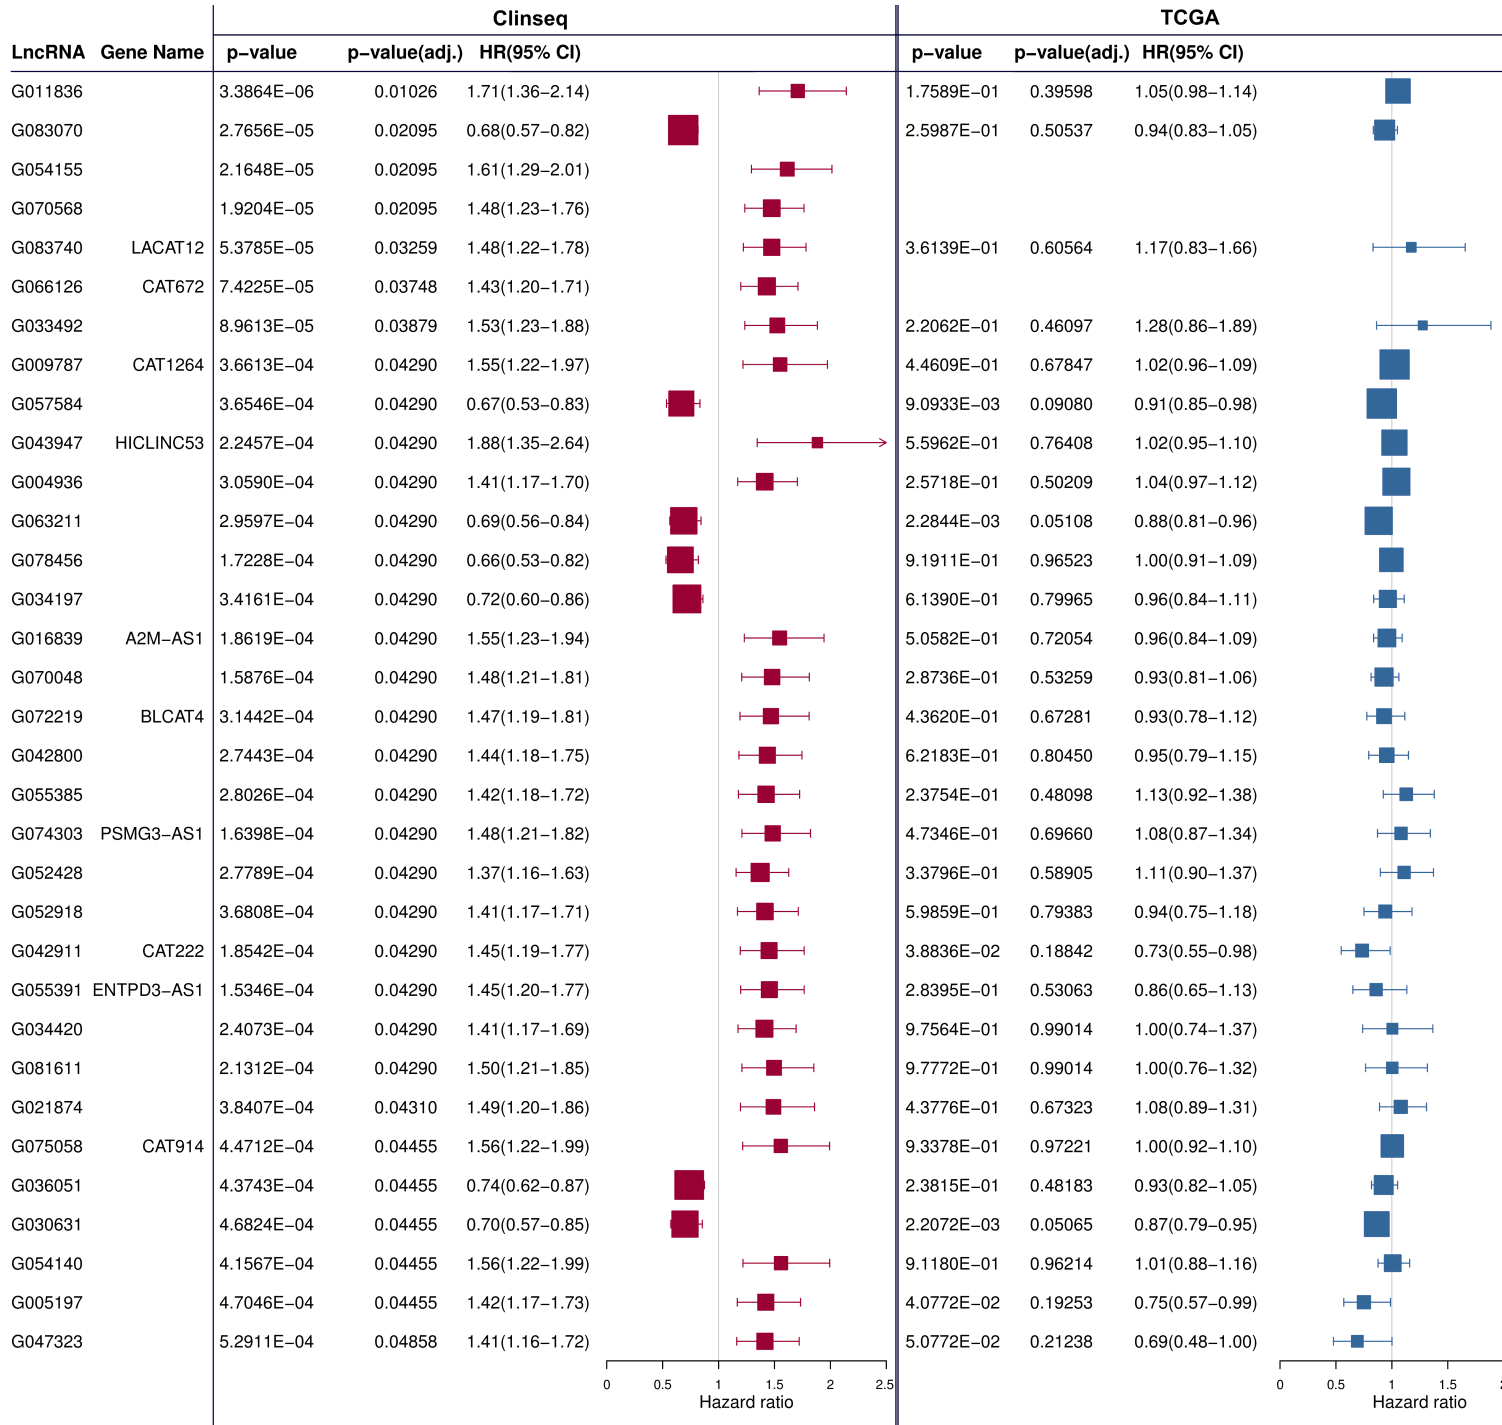

Figure S1: Multivariate time-to-event analysis (overall survival) of individual lncRNA (adjusting for established risk factors) in the Clinseq-AML (red) and TCGA-AML cohort (blue)

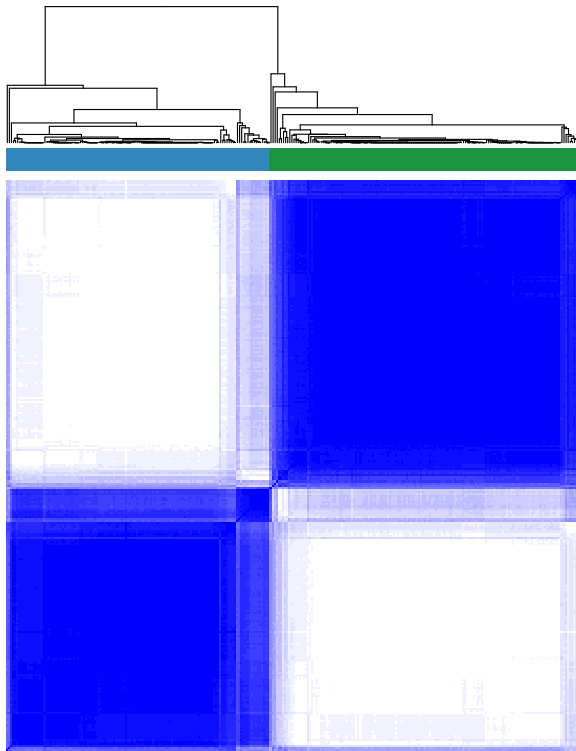(a)  $K=2$ 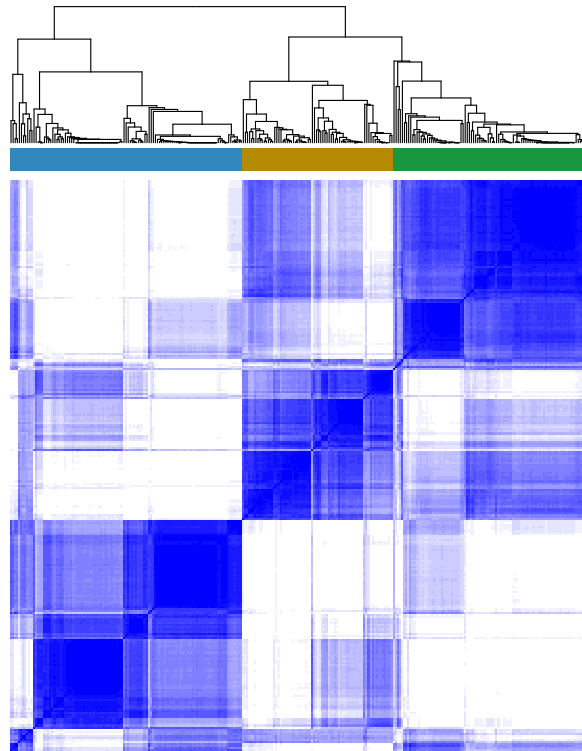(b)  $K=3$ 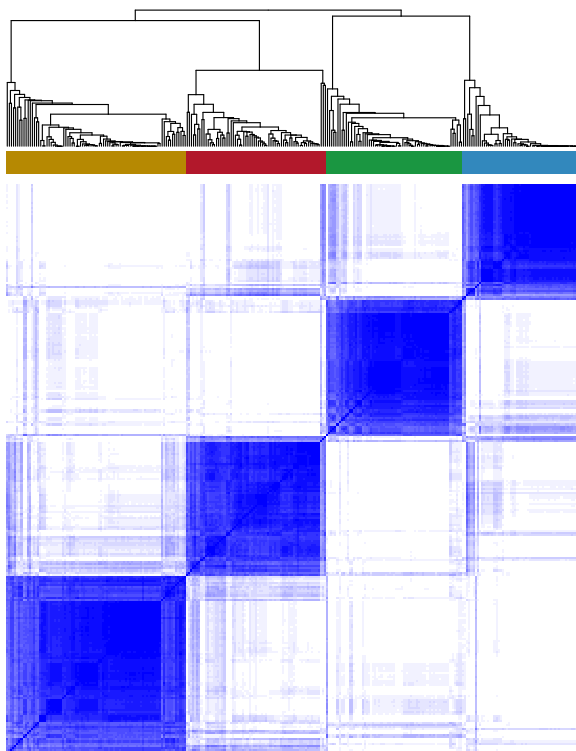(c)  $K=4$ 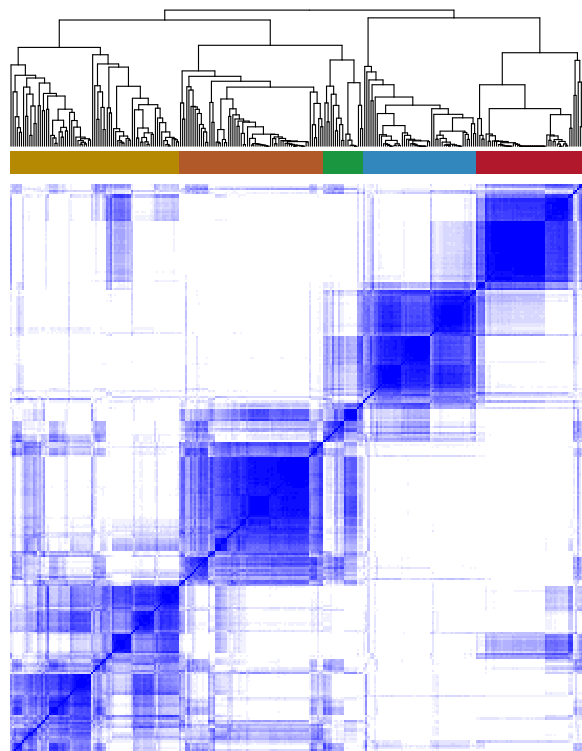(d)  $K=5$

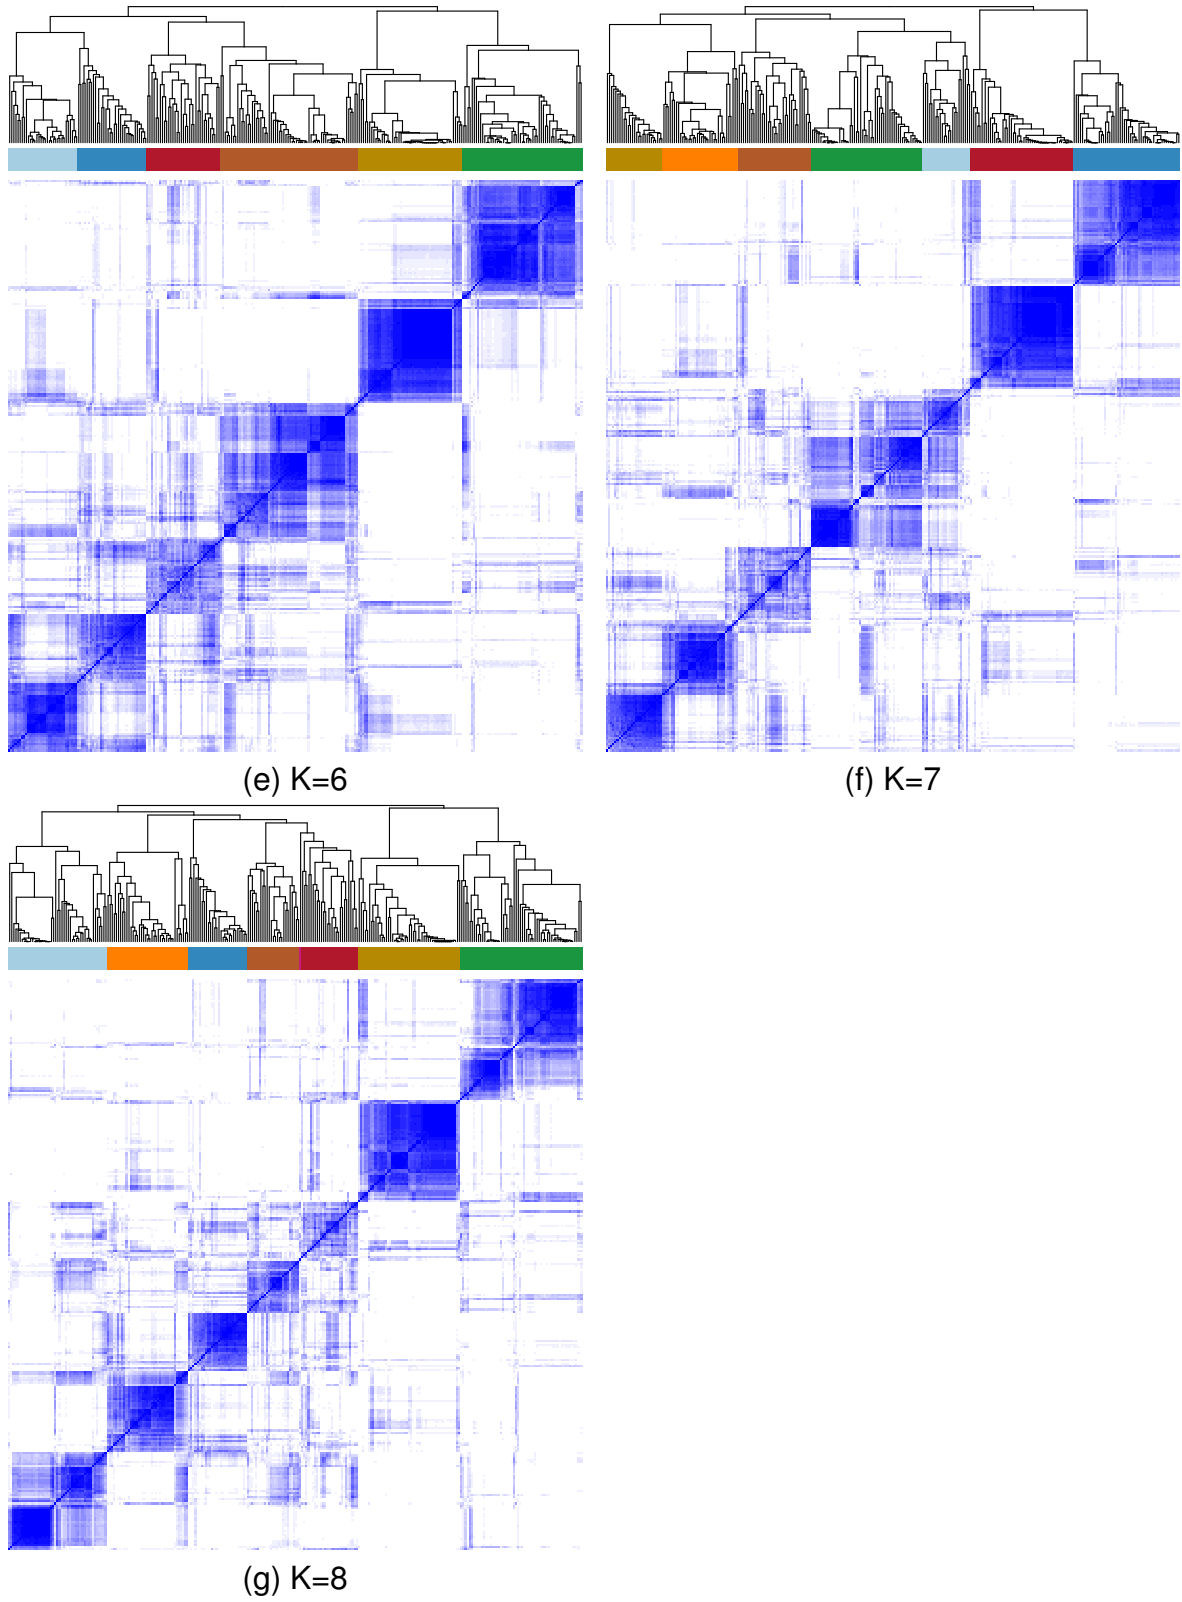

Figure S2: Consensus matrix for clustering

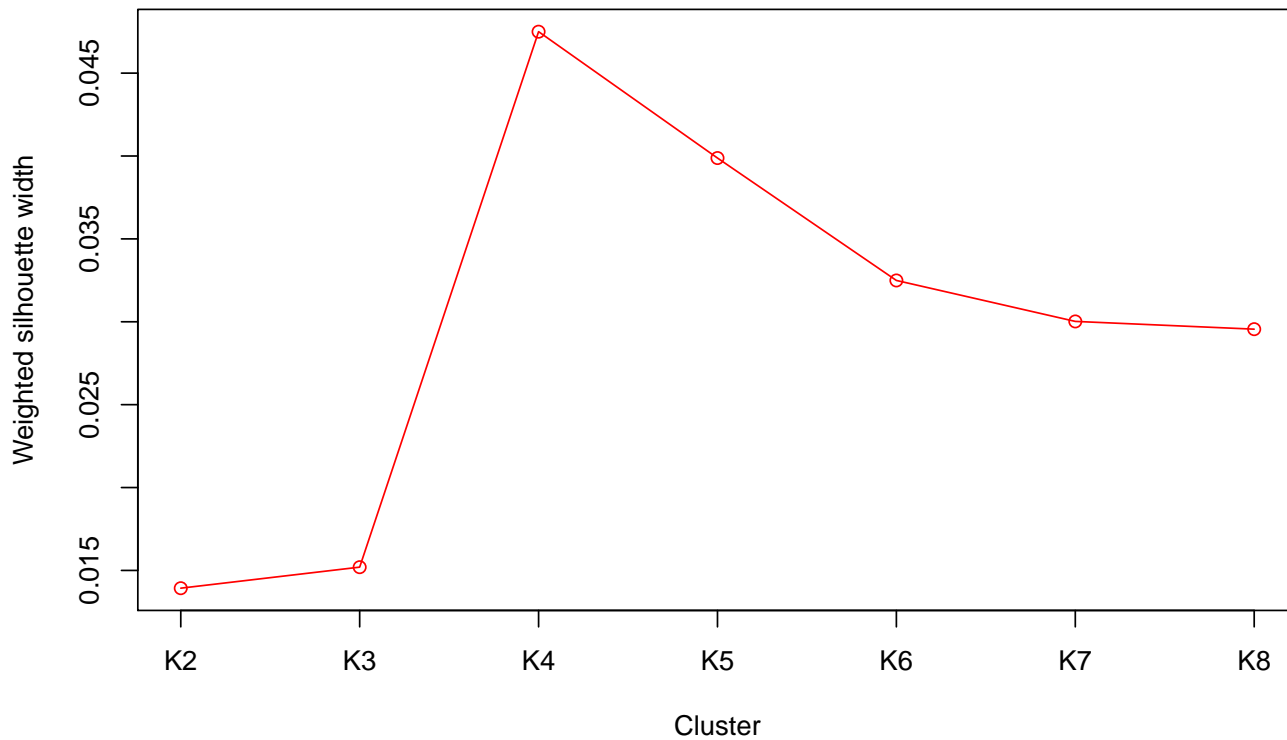

Figure S3: Weighted silhouette width for different number of clusters in lncRNA expression dataset

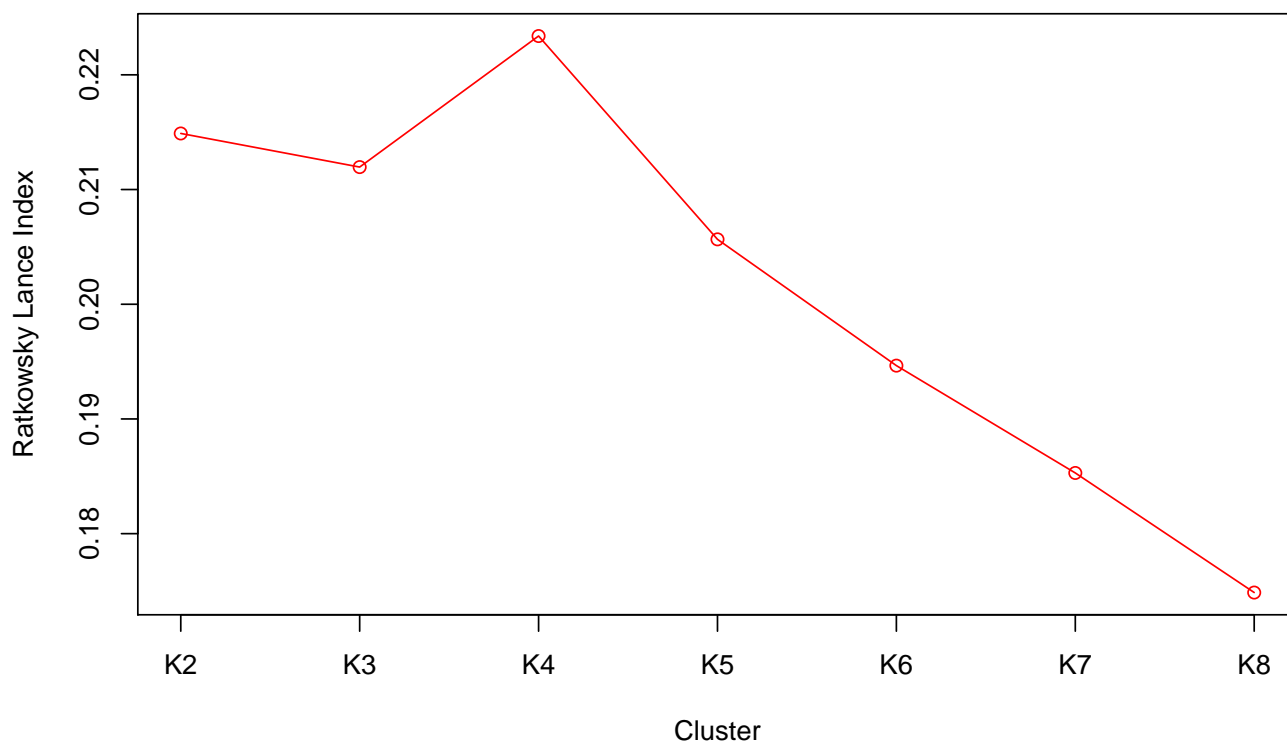

Figure S4: Clustering performance as a function of Ratkowsky Lance Index for different number of clusters in lncRNA expression dataset

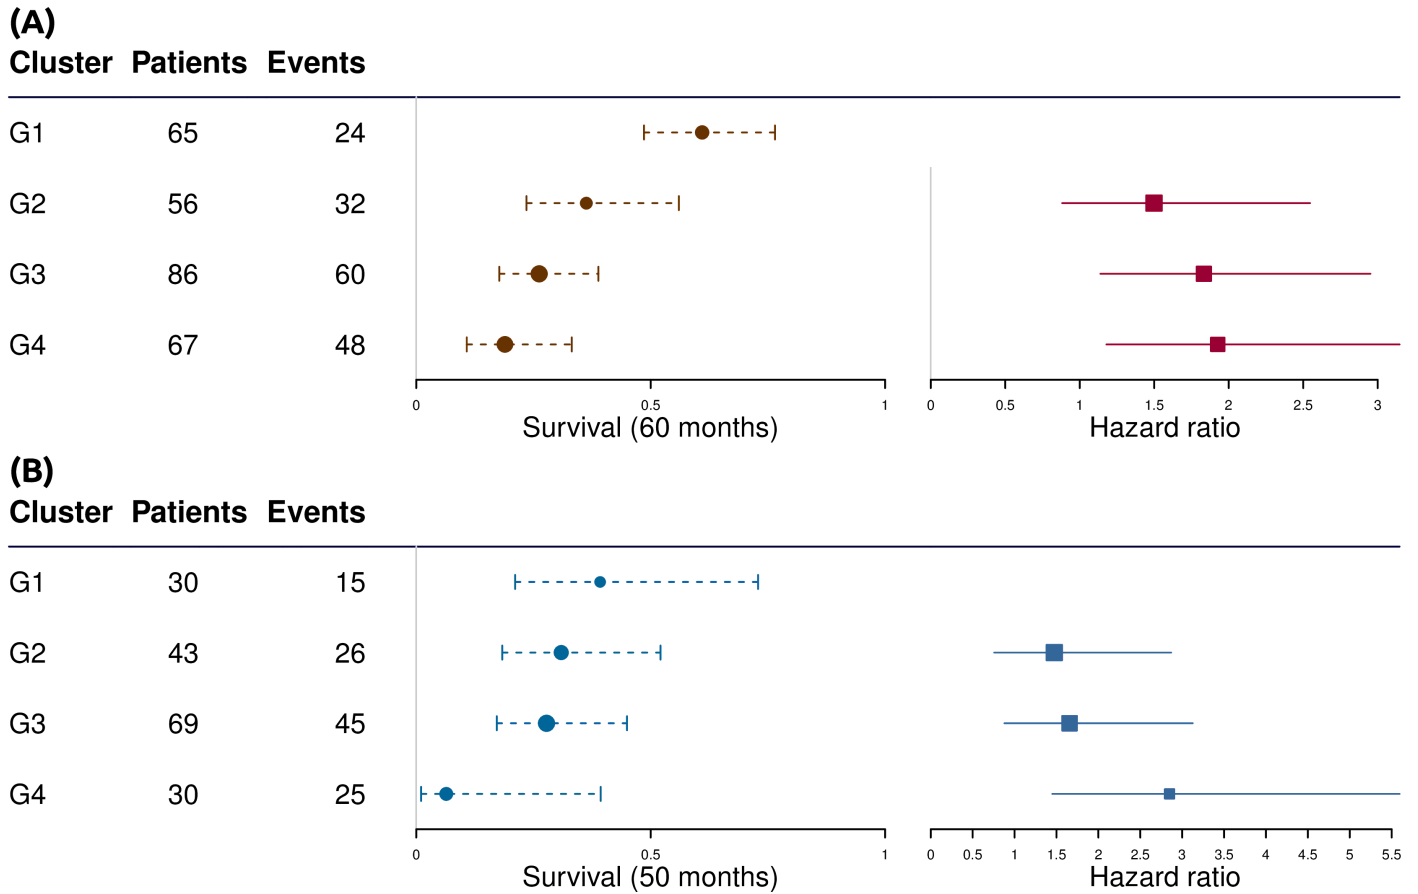

Figure S5: Hazard ratio and survival probability at 60 months in 4 different groups for (A) Clinseq AML cohort and (B) TCGA AML cohort. Barplot represent 95% confidence interval.

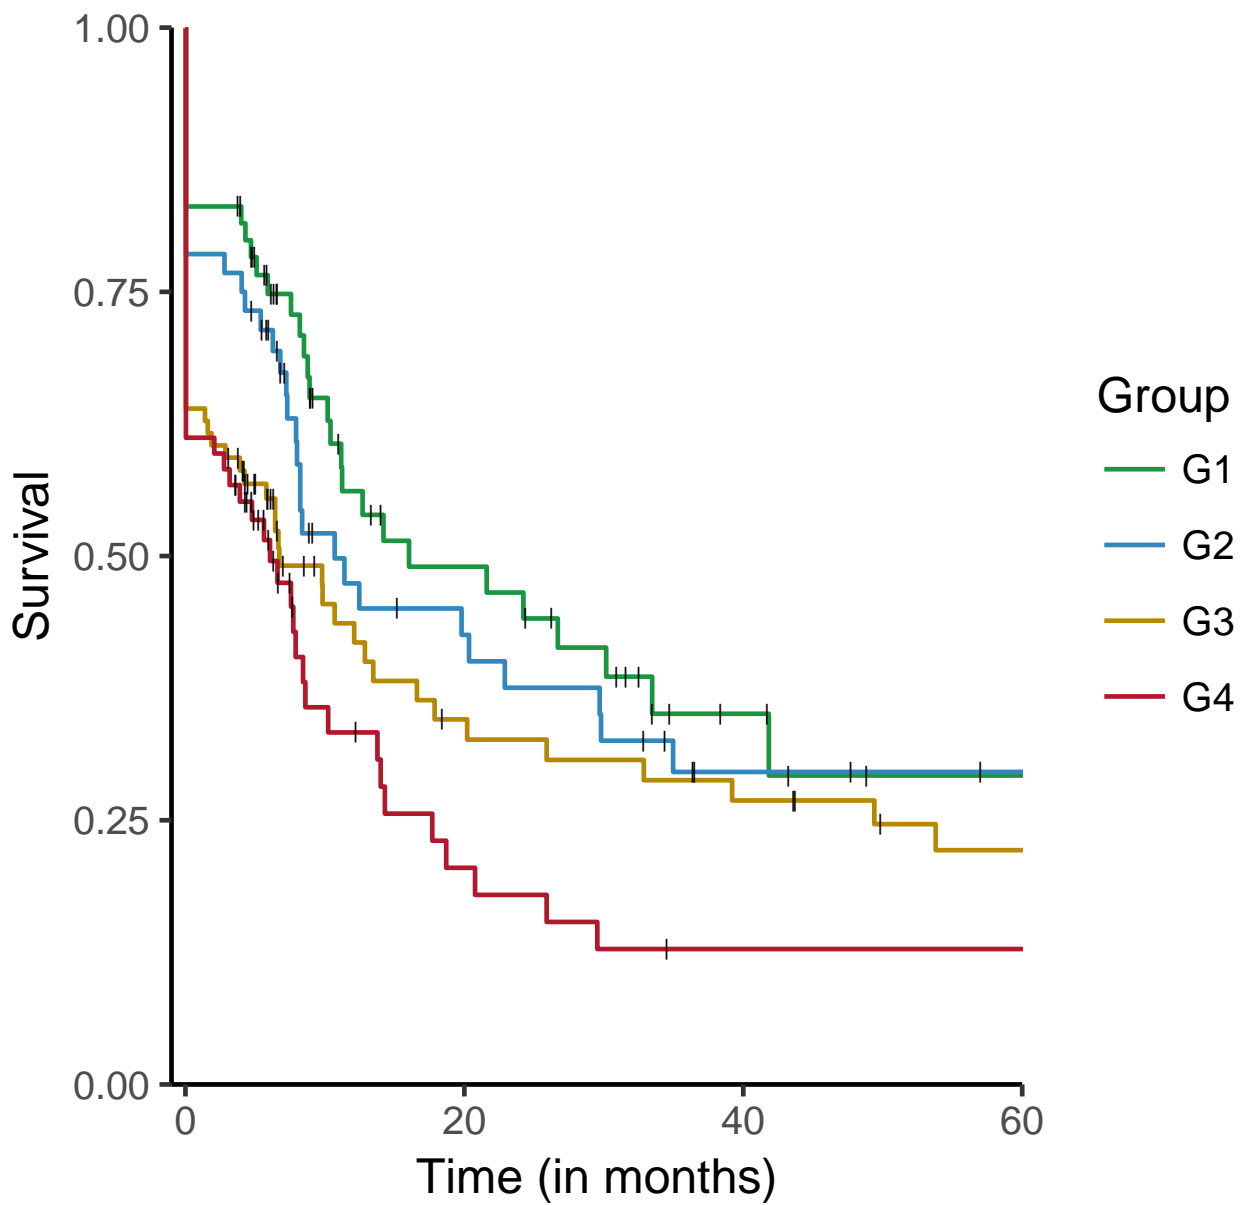

Figure S6: LncRNA expression subtypes and event free survival (Kaplan-Meier) in Clinseq AML cohort (p-value = 0.0159, Log-rank test).

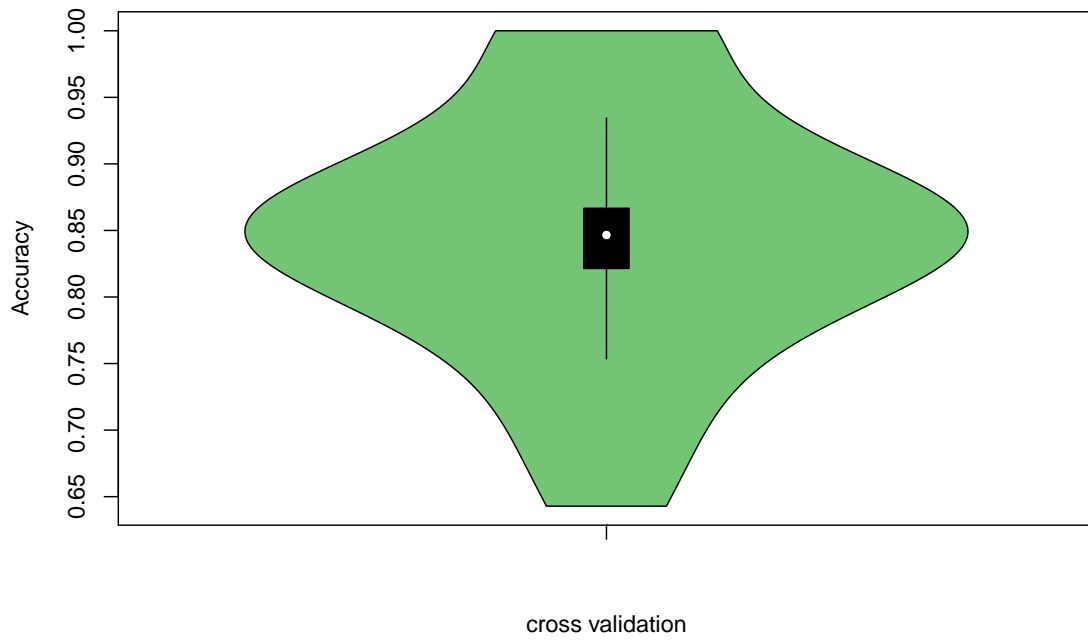

Figure S7: Violin plot visualisation for 100-fold cross-validation of lncRNA based AML subtype

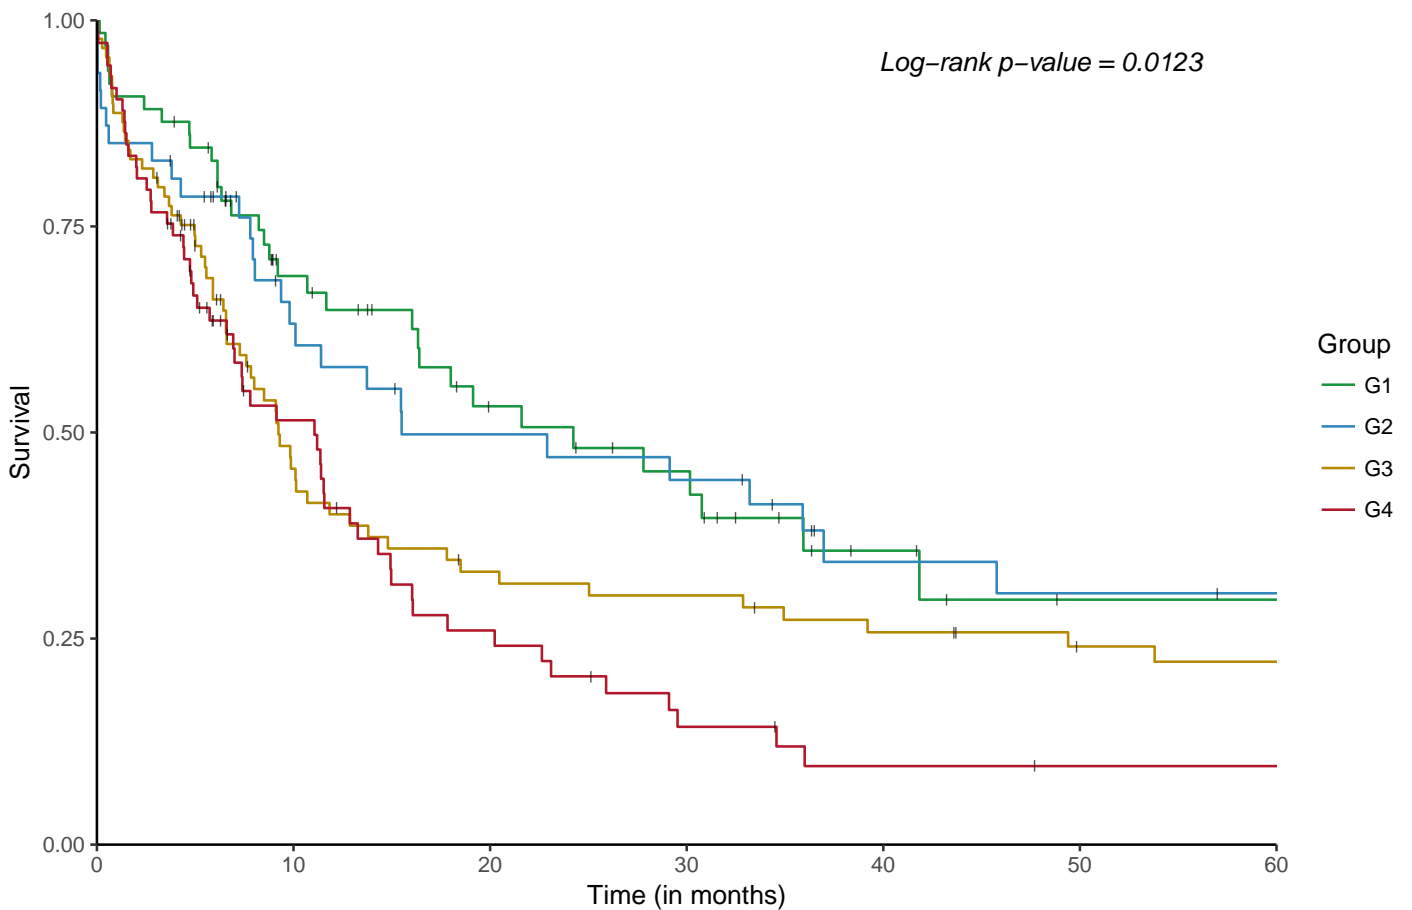

Figure S8: Overall survival (Kaplan-Meier) using predicted labels using 100-fold cross-validation in the complete Clinseq AML cohort

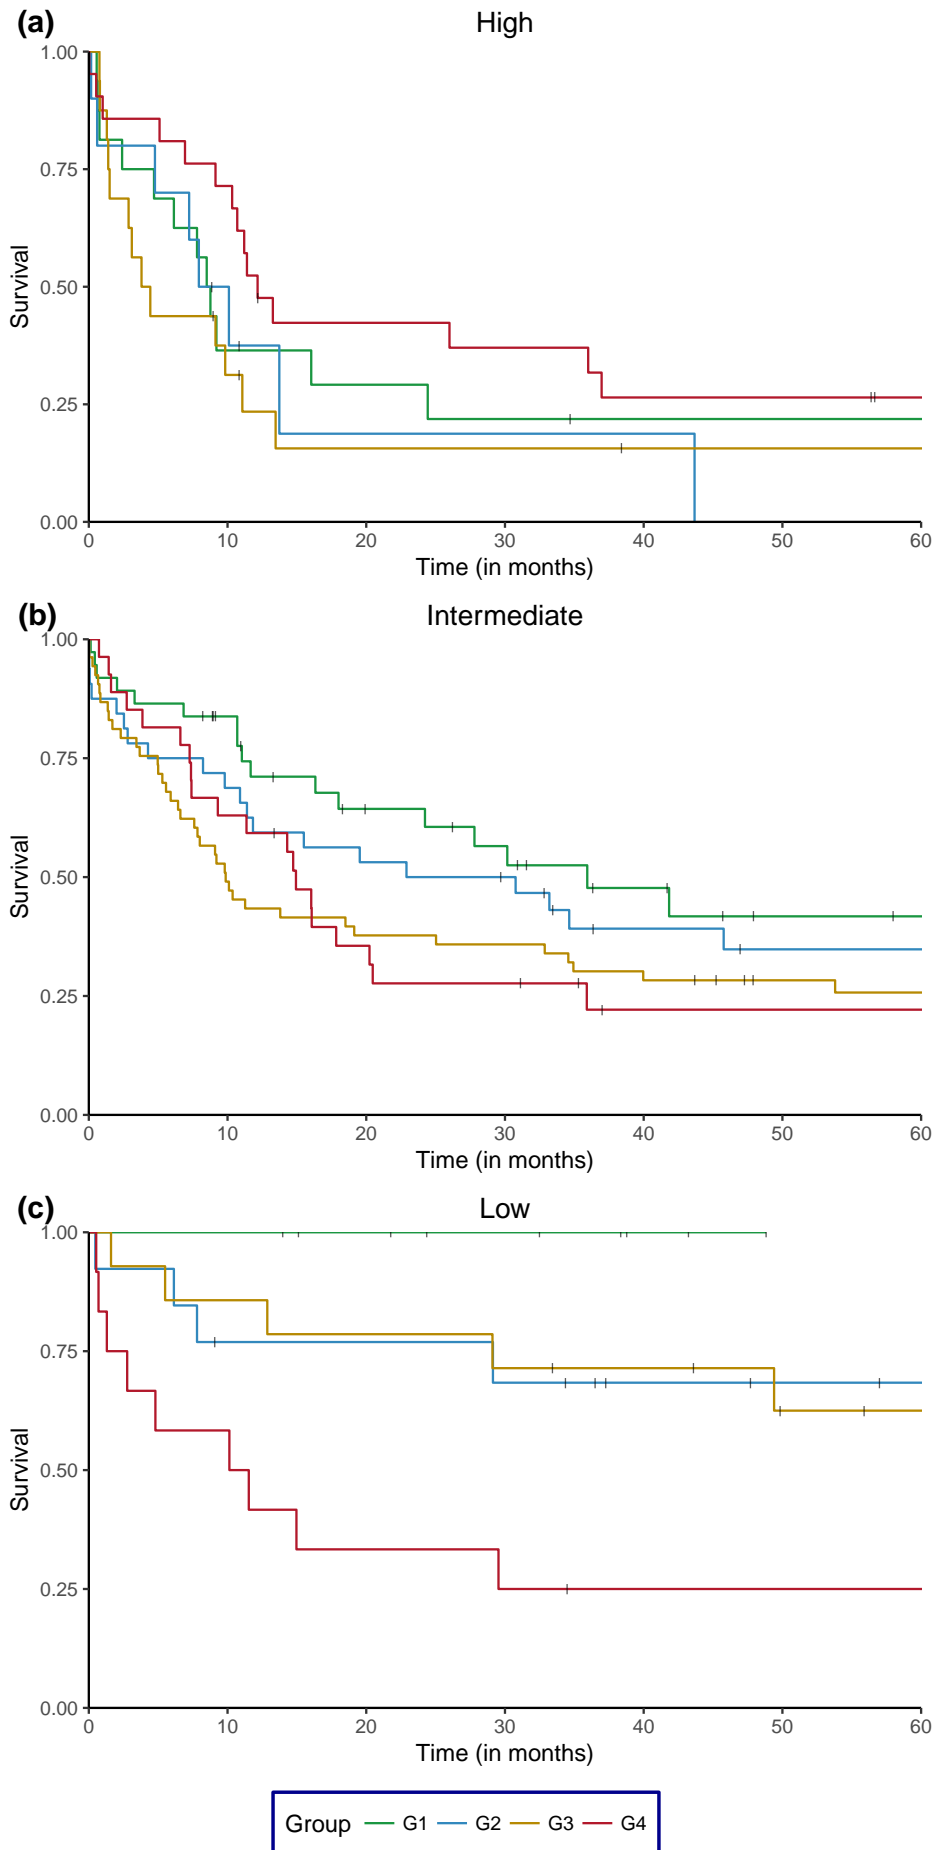

Figure S9: Overall survival (Kaplan-Meier) for 3 ELN risk groups, (a) high, (b) intermediate and (c) low further stratified by IncRNA based subtype



Table 1: CEBPA (p-value = 5.3242E-01)

|    | No mutation (in %) | Mutation (in %) | Double mutation (in %) |
|----|--------------------|-----------------|------------------------|
| G1 | 19.71              | 2.56            | 1.46                   |
| G2 | 18.25              | 1.82            | 0.36                   |
| G3 | 25.91              | 2.56            | 2.92                   |
| G4 | 21.90              | 1.09            | 1.46                   |

Table 2: NPM1 (p-value = 1.0924E-05)

|    | No mutation (in %) | Mutation (in %) |
|----|--------------------|-----------------|
| G1 | 17.15              | 6.57            |
| G2 | 13.50              | 6.93            |
| G3 | 16.79              | 14.60           |
| G4 | 22.26              | 2.19            |

Table 3: TP53 (p-value = 3.9498E-03)

|    | No mutation (in %) | Mutation (in %) |
|----|--------------------|-----------------|
| G1 | 21.90              | 1.82            |
| G2 | 19.34              | 1.09            |
| G3 | 30.29              | 1.09            |
| G4 | 19.71              | 4.75            |

Table 4: DNMT3A (p-value = 8.5920E-01)

|    | No mutation (in %) | Mutation (in %) |
|----|--------------------|-----------------|
| G1 | 17.88              | 5.84            |
| G2 | 15.33              | 5.11            |
| G3 | 25.18              | 6.20            |
| G4 | 18.61              | 5.84            |

Table 5: KRAS (p-value = 4.9475E-02)

|    | No mutation (in %) | Mutation (in %) |
|----|--------------------|-----------------|
| G1 | 22.63              | 1.09            |
| G2 | 18.61              | 1.82            |
| G3 | 31.39              | 0.00            |
| G4 | 23.36              | 1.09            |

Table 6: RUNX1 (p-value = 1.1877E-01)

|    | No mutation (in %) | Mutation (in %) |
|----|--------------------|-----------------|
| G1 | 18.61              | 5.11            |
| G2 | 17.88              | 2.56            |
| G3 | 28.83              | 2.56            |
| G4 | 20.44              | 4.01            |

Table 7: TET2 (p-value = 4.2230E-01)

|    | No mutation (in %) | Mutation (in %) |
|----|--------------------|-----------------|
| G1 | 18.61              | 5.11            |
| G2 | 14.60              | 5.84            |
| G3 | 23.72              | 7.66            |
| G4 | 20.44              | 4.01            |

---

Table 8: FLT3 mutation (p-value = 1.9160E-06)

|    | No mutation (in %) | Mutation (in %) |
|----|--------------------|-----------------|
| G1 | 18.25              | 5.47            |
| G2 | 14.96              | 5.47            |
| G3 | 16.42              | 14.96           |
| G4 | 22.26              | 2.19            |

---

Table 9: FLT3-ITD (p-value = 2.8758E-06)

|    | No duplication (in %) | Duplication (in %) |
|----|-----------------------|--------------------|
| G1 | 18.25                 | 5.47               |
| G2 | 16.06                 | 4.38               |
| G3 | 17.88                 | 13.50              |
| G4 | 22.99                 | 1.46               |

---

Table 10: Karyotype (p-value = 3.9627E-03)

|    | Abnormal (in %) | Normal (in %) |
|----|-----------------|---------------|
| G1 | 9.96            | 13.79         |
| G2 | 9.20            | 11.88         |
| G3 | 14.56           | 17.24         |
| G4 | 16.48           | 6.90          |

---

Table 11: t(8;21) (p-value = 2.3159E-01)

|    | Abnormal (in %) | Normal (in %) |
|----|-----------------|---------------|
| G1 | 0.00            | 23.75         |
| G2 | 0.38            | 20.69         |
| G3 | 0.38            | 31.42         |
| G4 | 1.15            | 22.22         |

---

Table 12: inv(16)/t(16;16) (p-value = 9.0495E-03)

|    | Abnormal (in %) | Normal (in %) |
|----|-----------------|---------------|
| G1 | 0.00            | 23.75         |
| G2 | 0.77            | 20.31         |
| G3 | 0.38            | 31.42         |
| G4 | 2.30            | 21.07         |

---

Table 13: t(15;17) (p-value = 6.5962E-01)

|    | Abnormal (in %) | Normal (in %) |
|----|-----------------|---------------|
| G1 | 1.15            | 22.61         |
| G2 | 0.38            | 20.69         |
| G3 | 1.53            | 30.27         |
| G4 | 0.38            | 22.99         |

---

Table 14: inv(3)/t(3;3) (p-value = 8.6716E-01)

|    | Abnormal (in %) | Normal (in %) |
|----|-----------------|---------------|
| G1 | 0.38            | 23.37         |
| G2 | 0.38            | 20.69         |
| G3 | 0.38            | 31.42         |
| G4 | 0.77            | 22.61         |

---

Table 15: t(11q23) (p-value = 2.9389E-01)

|    | Abnormal (in %) | Normal (in %) |
|----|-----------------|---------------|
| G1 | 0.00            | 23.75         |
| G2 | 1.15            | 19.92         |
| G3 | 0.77            | 31.03         |
| G4 | 0.77            | 22.61         |

Table 16: del5 (p-value = 7.8496E-03)

|    | Abnormal (in %) | Normal (in %) |
|----|-----------------|---------------|
| G1 | 1.92            | 21.84         |
| G2 | 0.77            | 20.31         |
| G3 | 0.38            | 31.42         |
| G4 | 3.45            | 19.92         |

---

Table 17: del7 (p-value = 1.5314E-02)

|    | Abnormal (in %) | Normal (in %) |
|----|-----------------|---------------|
| G1 | 2.68            | 21.07         |
| G2 | 0.38            | 20.69         |
| G3 | 2.68            | 29.12         |
| G4 | 4.60            | 18.77         |

---

Table 18: +8 (p-value = 2.4024E-01)

|    | Abnormal (in %) | Normal (in %) |
|----|-----------------|---------------|
| G1 | 0.77            | 22.99         |
| G2 | 1.92            | 19.16         |
| G3 | 1.53            | 30.27         |
| G4 | 2.68            | 20.69         |

---

Table 19: ELN Risk (p-value = 2.1069E-01)

|    | High (in %) | Intermediate (in %) | Low (in %) |
|----|-------------|---------------------|------------|
| G1 | 6.15        | 14.23               | 3.46       |
| G2 | 3.85        | 12.31               | 5.00       |
| G3 | 6.15        | 20.39               | 5.38       |
| G4 | 8.08        | 10.38               | 4.62       |

Table 20: Etiology (p-value = 1.5194E-01)

|    | de-novo (in %) | s-AML (in %) | t-AML (in %) |
|----|----------------|--------------|--------------|
| G1 | 17.65          | 1.47         | 4.04         |
| G2 | 16.54          | 1.47         | 2.57         |
| G3 | 26.84          | 2.94         | 1.84         |
| G4 | 20.59          | 2.94         | 1.10         |

Table 21: lncRNA vs. mRNA clusters (p-value = 2.5615E-68)

|    | C1 (in %) | C2 (in %) | C3 (in %) | C4 (in %) | C5 (in %) | C6 (in %) | C7 (in %) |
|----|-----------|-----------|-----------|-----------|-----------|-----------|-----------|
| G1 | 0.00      | 13.87     | 1.46      | 5.84      | 0.36      | 1.46      | 0.73      |
| G2 | 0.00      | 1.09      | 0.00      | 9.49      | 4.38      | 0.36      | 5.11      |
| G3 | 8.76      | 0.00      | 5.11      | 0.00      | 1.46      | 16.06     | 0.00      |
| G4 | 0.36      | 0.00      | 9.12      | 0.00      | 5.84      | 1.82      | 7.30      |

---
