# Supplementary material for: Expression levels of long non-coding RNAs are prognostic for AML outcome
Source: Springer Nature journal article supplement (doi:10.1186/s13045-018-0596-2), 2018-04-07
Supplement: MOESM7 [file 15599138]

|                                                                    | <b>TCGA (N=142)</b> |
|--------------------------------------------------------------------|---------------------|
| <b>Sex: No. of male (%)</b>                                        | 74 (52.1%)          |
| <b>Age: median (range)</b>                                         | 53 (18-81)          |
| <b>AML etiology type</b>                                           |                     |
| - De novo AML                                                      | 142                 |
| - s-AML                                                            | 0                   |
| - t-AML                                                            | 0                   |
| - Missing                                                          | 0                   |
| <b>Median follow-up (days)</b>                                     | 455.5               |
| <b>Bone marrow blast: median (range, %)</b>                        | 75% (30-100%)       |
| <b>White blood cell counts: median (range, per mm<sup>3</sup>)</b> | 21.1 (0.4-297.4)    |
| <b>Cytogenetic aberrations: N (%)</b>                              |                     |
| - normal                                                           | 64 (45.1%)          |
| - complex                                                          | 19 (13.4%)          |
| - t(15;17)                                                         | 13 (9.2%)           |
| - t(8;21)                                                          | 7 (4.9%)            |
| - inv(16)/t(16;16)                                                 | 11 (7.7%)           |
| - inv(3)/t(3;3)                                                    | 0                   |
| - del(5)                                                           | 8 (5.6%)            |
| - del(7)                                                           | 14 (9.9%)           |
| - t(11q23)                                                         | 4 (2.8%)            |
| <b>Mutation: N (%)</b>                                             |                     |
| - ASXL1                                                            | 2 (1.41%)           |
| - CEBPA                                                            | 12 (8.45%)          |
| - CEBPA (double)                                                   | 5 (3.52%)           |
| - DNMT3A                                                           | 34 (23.94%)         |
| - FLT3-TKD                                                         | 38 (26.76%)         |
| - FLT3-ITD                                                         | 29 (20.42%)         |
| - IDH1                                                             | 15 (10.56%)         |
| - IDH2                                                             | 13 (9.15%)          |
| - KRAS                                                             | 3 (2.11%)           |
| - NPM1                                                             | 40 (28.17%)         |
| - RUNX1                                                            | 11 (7.75%)          |
| - TET2                                                             | 11 (7.75%)          |
| - TP53                                                             | 9 (6.34%)           |
| - WT1                                                              | 9 (6.34%)           |

**Description of TCGA-AML cohort.** Abbreviations: WBC, white blood cell; ELN, European LeukemiaNet; FLT3-ITD, internal tandem duplication of the FLT3 gene; FLT3-TKD, tyrosine kinase domain mutation in the FLT3 gene; t-AML, therapy-related acute myeloid leukemia; s-AML, secondary acute myeloid leukemia
