# Supplementary material for: Expression levels of long non-coding RNAs are prognostic for AML outcome
Source: J Hematol Oncol. 2018 Apr 7;11:52. doi: 10.1186/s13045-018-0596-2 (PMC5889529; doi:10.1186/s13045-018-0596-2)
Supplement: Supplementary file 8 — lncRNA in de novo vs. non-de novo AML. Description of data: Differentially expressed lncRNA in de novo vs. non-de novo AML patients. (XLSX 13 kb) [file 13045_2018_596_MOESM8_ESM.xlsx]

## Sheet: deNovo_Vs_nonDeNovo_AML
LncRNA	logFC	AveExpr	t	P.Value	adj.P.Val	B	abs.logFC
G078496	-0.616089	-1.81731e-17	-3.92955	8.51107e-05	0.257886	-0.0725823	0.616089
G023358	-0.524797	-2.39449e-17	-3.34727	0.000816156	0.582643	-1.45944	0.524797
G031248	0.521244	-2.53193e-18	3.32461	0.000885451	0.582643	-1.50892	0.521244
G036518	-0.509229	-2.07688e-17	-3.24797	0.00116234	0.582643	-1.67379	0.509229
G077198	-0.499236	-8.49504e-18	-3.18424	0.00145142	0.582643	-1.80798	0.499236
G033127	-0.493519	1.77937e-17	-3.14778	0.00164524	0.582643	-1.88354	0.493519
G034415	-0.492215	-5.58364e-18	-3.13946	0.00169268	0.582643	-1.90066	0.492215
G041059	0.491501	-3.43756e-18	3.1349	0.00171919	0.582643	-1.91002	0.491501
G065556	-0.481283	1.20155e-17	-3.06973	0.0021426	0.582643	-2.04237	0.481283
G085594	-0.479009	2.00514e-17	-3.05523	0.00224897	0.582643	-2.07144	0.479009
G023359	-0.478186	3.92609e-17	-3.04997	0.00228868	0.582643	-2.08194	0.478186
G016185	-0.4778	-1.72532e-17	-3.04751	0.0023075	0.582643	-2.08685	0.4778
G012825	-0.465052	1.62375e-17	-2.96621	0.00301507	0.618035	-2.24689	0.465052
G079033	-0.463577	1.75633e-17	-2.9568	0.00310863	0.618035	-2.26513	0.463577
G073121	-0.463177	1.2548e-17	-2.95425	0.00313441	0.618035	-2.27006	0.463177
G023369	-0.458352	1.52043e-17	-2.92347	0.00346161	0.618035	-2.32927	0.458352
G055593	0.458269	2.67096e-17	2.92294	0.00346752	0.618035	-2.33029	0.458269
G090111	0.442656	8.78523e-18	2.82336	0.00475244	0.637596	-2.51758	0.442656
G004463	-0.437992	1.48392e-17	-2.79361	0.00521248	0.637596	-2.57228	0.437992
G040855	0.435929	-1.32464e-17	2.78045	0.00542846	0.637596	-2.59628	0.435929
G059414	0.435091	1.60079e-18	2.77511	0.00551843	0.637596	-2.60599	0.435091
G067753	-0.434047	-3.98604e-19	-2.76845	0.00563255	0.637596	-2.61809	0.434047
G012721	0.431189	-1.57098e-17	2.75022	0.00595565	0.637596	-2.65101	0.431189
G050855	0.43008	-1.32018e-18	2.74314	0.00608553	0.637596	-2.66373	0.43008
G004462	-0.428255	-1.2631e-17	-2.73151	0.00630465	0.637596	-2.68458	0.428255
G020711	0.427292	5.77816e-18	2.72536	0.00642326	0.637596	-2.69556	0.427292
G002853	-0.425828	5.25519e-18	-2.71603	0.00660722	0.637596	-2.71219	0.425828
G011607	0.425745	2.15087e-17	2.71549	0.00661784	0.637596	-2.71313	0.425745
G061500	-0.423983	2.34794e-17	-2.70426	0.00684587	0.637596	-2.73306	0.423983
G040759	0.421512	2.03256e-17	2.6885	0.00717755	0.637596	-2.76088	0.421512
G024228	0.420295	5.67612e-19	2.68074	0.00734617	0.637596	-2.77452	0.420295
G007841	-0.418658	-1.45921e-17	-2.67029	0.00757869	0.637596	-2.79281	0.418658
G083408	0.416001	-4.54408e-18	2.65334	0.00797001	0.637596	-2.82235	0.416001
G019264	0.415009	7.15892e-18	2.64702	0.0081206	0.637596	-2.83332	0.415009
G067222	-0.41428	1.20028e-17	-2.64237	0.00823293	0.637596	-2.84136	0.41428
G043888	-0.413757	-1.74429e-17	-2.63904	0.00831437	0.637596	-2.84713	0.413757
G073972	-0.412868	-6.83685e-18	-2.63336	0.00845458	0.637596	-2.85692	0.412868
G078396	0.409932	2.00992e-17	2.61464	0.00893238	0.637596	-2.88909	0.409932
G016805	0.409736	1.7242e-17	2.61338	0.00896519	0.637596	-2.89123	0.409736
G039319	-0.409524	-1.69136e-17	-2.61203	0.0090007	0.637596	-2.89354	0.409524
G078529	-0.407651	-8.18254e-18	-2.60009	0.00932012	0.637596	-2.91392	0.407651
G015088	-0.407127	3.29757e-17	-2.59675	0.00941123	0.637596	-2.9196	0.407127
G025375	-0.406882	2.05664e-17	-2.59519	0.00945415	0.637596	-2.92225	0.406882
G021782	-0.406802	3.07722e-18	-2.59467	0.00946829	0.637596	-2.92313	0.406802
G000595	-0.406399	1.51788e-18	-2.5921	0.00953926	0.637596	-2.92749	0.406399
G070969	0.40561	7.78075e-19	2.58707	0.00967968	0.637596	-2.93602	0.40561
G008909	0.402301	4.64931e-18	2.56596	0.0102891	0.649277	-2.97162	0.402301
G028173	-0.400054	-5.98224e-18	-2.55164	0.010722	0.649277	-2.99562	0.400054
G004535	-0.399867	3.12505e-19	-2.55044	0.0107589	0.649277	-2.99762	0.399867
G025078	0.399676	2.08326e-17	2.54922	0.0107965	0.649277	-2.99965	0.399676
G070315	0.39797	-8.28299e-18	2.53834	0.0111381	0.649277	-3.01777	0.39797
G031149	-0.397203	-2.0281e-17	-2.53345	0.0112949	0.649277	-3.02589	0.397203
G087723	0.396901	1.7816e-17	2.53152	0.011357	0.649277	-3.02908	0.396901
G077602	-0.3939	2.398e-17	-2.51238	0.0119921	0.649743	-3.06068	0.3939
G033382	-0.387628	3.95415e-18	-2.47238	0.0134221	0.649743	-3.12595	0.387628
G050531	0.386555	2.1008e-17	2.46554	0.013681	0.649743	-3.13701	0.386555
G027357	-0.385978	2.21783e-17	-2.46186	0.0138222	0.649743	-3.14294	0.385978
G034417	-0.385157	4.37507e-18	-2.45662	0.0140254	0.649743	-3.15138	0.385157
G052825	-0.381213	-9.04352e-18	-2.43146	0.0150383	0.649743	-3.19163	0.381213
G072856	0.380772	1.01596e-17	2.42865	0.0151555	0.649743	-3.1961	0.380772
G039611	-0.378008	-1.99095e-17	-2.41102	0.0159082	0.649743	-3.22402	0.378008
G054435	-0.377822	2.58295e-18	-2.40983	0.0159602	0.649743	-3.2259	0.377822
G070048	0.37758	1.92047e-17	2.40829	0.0160277	0.649743	-3.22833	0.37758
G076297	-0.376176	-1.31699e-17	-2.39933	0.0164252	0.649743	-3.24242	0.376176
G010221	-0.376156	-6.50202e-18	-2.39921	0.0164308	0.649743	-3.24262	0.376156
G082965	-0.375327	-2.66331e-17	-2.39392	0.0166697	0.649743	-3.25092	0.375327
G069339	-0.374527	-3.52685e-18	-2.38882	0.0169029	0.649743	-3.2589	0.374527
G065554	-0.374038	1.05909e-18	-2.3857	0.0170469	0.649743	-3.26378	0.374038
G087075	-0.372488	1.46973e-17	-2.37581	0.0175108	0.649743	-3.27919	0.372488
G004479	-0.372057	8.22559e-18	-2.37306	0.0176415	0.649743	-3.28346	0.372057
G015596	-0.371351	-1.09696e-18	-2.36856	0.0178579	0.649743	-3.29045	0.371351
G085596	-0.370962	3.32914e-18	-2.36608	0.0179777	0.649743	-3.29429	0.370962
G001409	-0.370656	2.76025e-17	-2.36412	0.018073	0.649743	-3.29732	0.370656
G036958	-0.369748	3.02429e-17	-2.35833	0.0183575	0.649743	-3.30627	0.369748
G005096	0.369044	2.60527e-17	2.35384	0.0185807	0.649743	-3.3132	0.369044
G076224	-0.369005	1.10334e-18	-2.35359	0.0185931	0.649743	-3.31358	0.369005
G027447	-0.368563	1.88269e-17	-2.35078	0.0187344	0.649743	-3.31791	0.368563
G022067	-0.368468	7.54477e-18	-2.35017	0.018765	0.649743	-3.31885	0.368468
G013752	0.368062	6.23097e-18	2.34758	0.018896	0.649743	-3.32283	0.368062
G047149	-0.367757	-1.8559e-17	-2.34563	0.018995	0.649743	-3.32582	0.367757
G074203	0.366816	3.37059e-18	2.33964	0.0193028	0.649743	-3.33502	0.366816
G070946	0.366719	1.48185e-17	2.33901	0.019335	0.649743	-3.33597	0.366719
G004419	-0.366696	-2.59443e-17	-2.33887	0.0193425	0.649743	-3.3362	0.366696
G046739	0.366344	4.34382e-17	2.33662	0.0194591	0.649743	-3.33963	0.366344
G035951	-0.366318	-1.51406e-17	-2.33646	0.0194677	0.649743	-3.33989	0.366318
G021507	-0.365049	7.52883e-18	-2.32836	0.0198932	0.649743	-3.35225	0.365049
G055591	0.364644	-7.33431e-20	2.32578	0.0200307	0.649743	-3.35618	0.364644
G026146	0.363718	-1.0402e-17	2.31988	0.0203478	0.649743	-3.36515	0.363718
G067747	-0.363374	-8.14746e-18	-2.31768	0.020467	0.649743	-3.36849	0.363374
G004398	-0.363311	-9.73231e-18	-2.31728	0.0204889	0.649743	-3.3691	0.363311
G036953	-0.363144	2.07513e-17	-2.31621	0.0205469	0.649743	-3.37071	0.363144
G019430	-0.362832	2.07035e-17	-2.31422	0.0206558	0.649743	-3.37373	0.362832
G084341	0.361217	1.66202e-17	2.30393	0.0212271	0.649743	-3.3893	0.361217
G074390	0.360979	-1.52833e-17	2.3024	0.0213127	0.649743	-3.39159	0.360979
G009594	-0.360534	3.29725e-18	-2.29957	0.021473	0.649743	-3.39586	0.360534
G026143	0.360004	-1.78861e-17	2.29618	0.0216656	0.649743	-3.40095	0.360004
G065370	0.359385	-7.23227e-18	2.29224	0.0218922	0.649743	-3.40688	0.359385
G018617	0.359158	1.52554e-17	2.29079	0.0219757	0.649743	-3.40905	0.359158
G059959	0.358882	7.71059e-18	2.28903	0.0220779	0.649743	-3.41169	0.358882
